# Supplementary material for: Species-Specific Conservation of Linear Antigenic Sites on Vaccinia Virus A27 Protein Homologs of Orthopoxviruses
Source: MDPI journal article supplement (doi:10.3390/v11060493), 2019-05-29
Supplement: s1 [file s1]

**Table S2** Detection of the six A27 antigenic sites by the corresponding anti-OPXV-mAbs *via* SPOTs-membrane and OPXV peptide microarray chip.

| Epitope | Epitope sequences determined on SPOTs-membrane: |                 | Epitope sequence determined on OPXV peptide microarray: |                       |
|---------|-------------------------------------------------|-----------------|---------------------------------------------------------|-----------------------|
|         | AA position                                     | AA composition  | AA position                                             | AA composition        |
| 1A      | 32-39                                           | <u>REAIVKAD</u> | 31-39                                                   | K <u>REAIVKAD</u>     |
| 1B      | 28-33                                           | <u>PEAKRE</u>   | 28-33                                                   | <u>PEAKRE</u>         |
| 1C      | 26-31                                           | KK <u>PEAK</u>  | 28-33                                                   | <u>PEAKRE</u>         |
| 1D      | 28-34                                           | <u>PEAKREA</u>  | 28-33                                                   | <u>PEAKRE</u>         |
| 4       | 9-14                                            | <u>DDDLAI</u>   | 7-18                                                    | PG <u>DDDLAI</u> PATE |
| 5       | 68-71                                           | IEKC            | -                                                       | Not detected          |

The matches within the epitope sequence are highlighted and underlined.
