# Supplementary material for: Species-Specific Conservation of Linear Antigenic Sites on Vaccinia Virus A27 Protein Homologs of Orthopoxviruses
Source: MDPI journal article supplement (doi:10.3390/v11060493), 2019-05-29
Supplement: s1 [file s1]

- 1 **Table S6** Mapping of epitope #5 based on 391 complete and partial amino acid sequences  
 2 from the NCBI GenBank database.

| <b>Linear A27 epitope aa 68-71</b> | <b>OPXV genera</b>      | <b>Number of DB entries</b> |
|------------------------------------|-------------------------|-----------------------------|
| IEKC                               | VARV major              | 67/67                       |
|                                    | VARV minor              | 2/2                         |
|                                    | VACV                    | 60/61                       |
|                                    | BPXV                    | 26/26                       |
|                                    | HSPV                    | 2/2                         |
|                                    | RPXV                    | 2/2                         |
|                                    | CMLV                    | 18/18                       |
|                                    | CPXV                    | 132/134                     |
|                                    | ECTV                    | 14/14                       |
|                                    | MPXV                    | 57/57                       |
|                                    | TaPXV                   | 3/3                         |
|                                    | RCNV                    | 1/1                         |
|                                    | VPXV                    | 1/1                         |
|                                    | <u>(aa 93-96)</u> SkPXV | 3/3                         |
|                                    | <u>(aa 93-96)</u> VACV  | 1/61                        |
| IEK <u>Y</u>                       | CPXV                    | 1/134                       |
| <u>C-Terminus truncated</u>        | CPXV                    | 1/134                       |

- 3 Differences within the epitope sequence are highlighted.
