# Supplementary material for: Species-Specific Conservation of Linear Antigenic Sites on Vaccinia Virus A27 Protein Homologs of Orthopoxviruses
Source: MDPI journal article supplement (doi:10.3390/v11060493), 2019-05-29
Supplement: s1 [file s1]

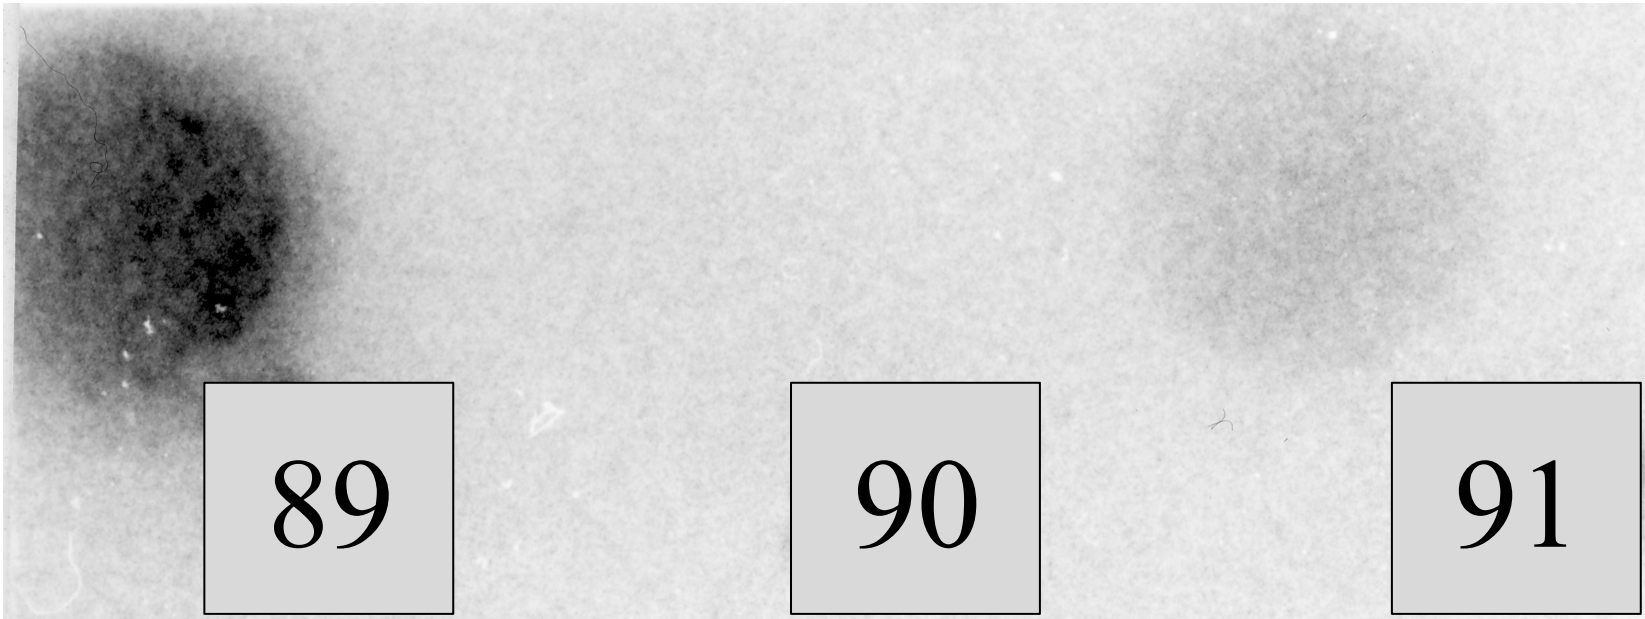

Spot 89: Epitope 1A in VACV Copenhagen: REAIVKAD

Spot 90: Epitope 1A in MPXV Copenhagen: REAIVKAY

Spot 91: Epitope 1A in ECTV Munich 1: HEATVKAD

aa 32 33 34 35 36 37 38 39
