# Supplementary material for: Species-Specific Conservation of Linear Antigenic Sites on Vaccinia Virus A27 Protein Homologs of Orthopoxviruses
Source: MDPI journal article supplement (doi:10.3390/v11060493), 2019-05-29
Supplement: s1 [file s1]

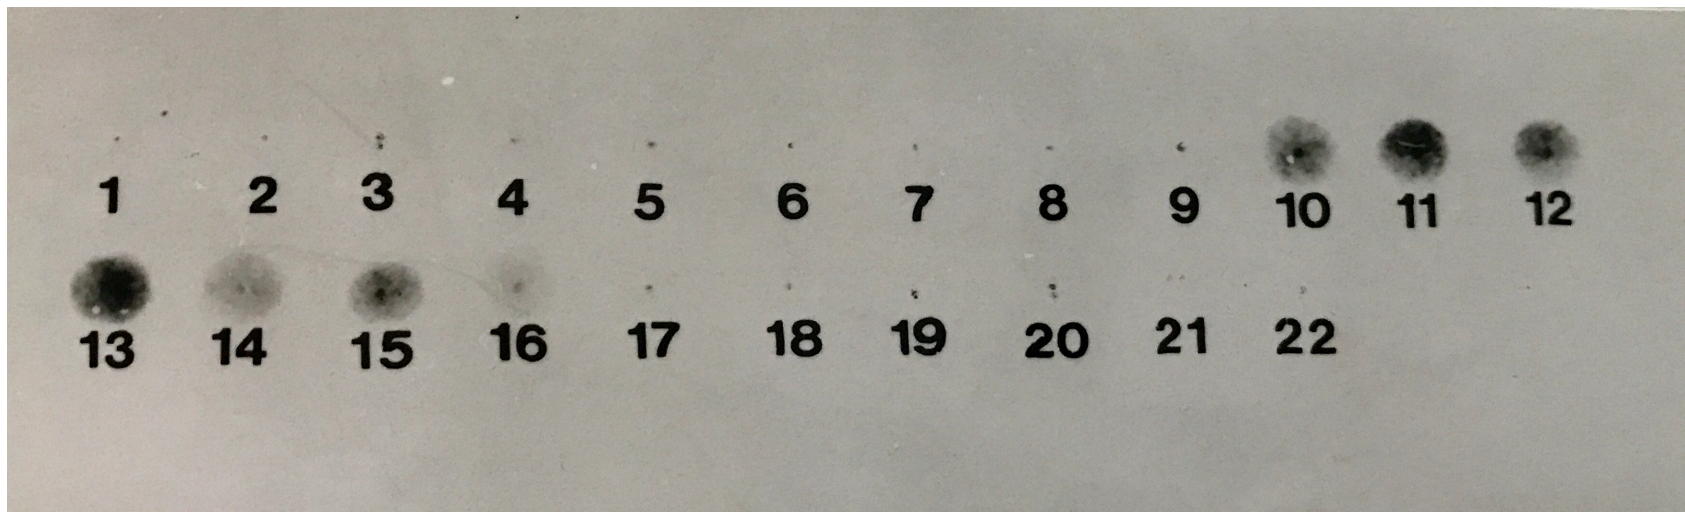

Peptide Nr. 10: E A K R E A **I V K A**

Peptide Nr. 11:

A K **R E A I V K A D**

Peptide Nr. 12:

K **R E A I V K A D** E

Peptide Nr. 13:

**R E A I V K A D** E D

Peptide Nr. 14:

E A **I V K A** D E D D

Peptide Nr. 15:

A **I V K A** D E D D N

Peptide Nr. 16:

**I V K A** D E D D N E
