# Supplementary material for: Species-Specific Conservation of Linear Antigenic Sites on Vaccinia Virus A27 Protein Homologs of Orthopoxviruses
Source: MDPI journal article supplement (doi:10.3390/v11060493), 2019-05-29
Supplement: s1 [file s1]

**Table S3** Mapping of epitope #4 based on 391 complete and partial amino acid sequences from the NCBI GenBank database.

| <b>Linear A27 epitope aa 9-14</b>  | <b>OPXV genera</b> | <b>Number of DB entries</b> |
|------------------------------------|--------------------|-----------------------------|
| DDDLAI                             | VARV major         | 66/67                       |
|                                    | VARV minor         | 2/2                         |
|                                    | VACV               | 60/61                       |
|                                    | BPXV               | 23/26                       |
|                                    | HSPV               | 2/2                         |
|                                    | RPXV               | 2/2                         |
|                                    | CMLV               | 17/18                       |
|                                    | CPXV               | 128/134                     |
|                                    | ECTV               | 13/14                       |
|                                    | MPXV               | 57/57                       |
|                                    | TaPXV              | 2/3                         |
| DDDLAT                             | BPXV               | 3/26                        |
| DDDMAI                             | SkPXV              | 3/3                         |
| <u><b>N-Terminus truncated</b></u> | VARV major         | 1/67                        |
|                                    | CMLV               | 1/18                        |
|                                    | CPXV               | 6/133                       |
|                                    | ECTV               | 1/14                        |
|                                    | TaPXV              | 1/3                         |
|                                    | RCNV               | 1/1                         |
|                                    | VPXV               | 1/1                         |
| <u><b>RARSPR</b></u>               | VACV               | 1/61                        |

Differences within the epitope sequence are highlighted.
