# Supplementary material for: Species-Specific Conservation of Linear Antigenic Sites on Vaccinia Virus A27 Protein Homologs of Orthopoxviruses
Source: MDPI journal article supplement (doi:10.3390/v11060493), 2019-05-29
Supplement: s1 [file s1]

**Table S1** Reactivity of six A27-specific mAbs on the OPXV microarray chip. The amino acids marked in red are species-specific sequence variations to the VACV WR or epitope sequence exchanges.

| Spot ID | Spot Designation     | Sequence Variations                                                                            | Epitope 1A                                         | Epitope 1B | Epitope 1C | Epitope 1D | Epitope 4    | Epitope 5 |
|---------|----------------------|------------------------------------------------------------------------------------------------|----------------------------------------------------|------------|------------|------------|--------------|-----------|
|         |                      |                                                                                                | Epitope sequence according to SPOTs Membrane       |            |            |            |              |           |
|         |                      |                                                                                                | REAIVKAD                                           | PEAKRE     | KKPEAK     | PEAKREA    | DDDLAI       | IEKC      |
|         |                      |                                                                                                | Epitope sequence according to OPXV Microarray Chip |            |            |            |              |           |
|         |                      |                                                                                                | KREAIVKAD                                          | PEAKRE     | PEAKRE     | PEAKRE     | PGDDDLAIPATE | n.d.      |
| 2       | VACV WR (AAO89429.1) | TLFPGDDDLAIPATE                                                                                |                                                    |            |            |            |              |           |
| 3       |                      | PGDDDLAIPATEFFS                                                                                |                                                    |            |            |            |              |           |
| 478     | VACV WR (AAO89429.1) | LFPGDDDLAIPATEF                                                                                |                                                    |            |            |            |              |           |
| 479     | SkPXV (AAQ72922.1)*  | LFPGDDDM <sup>red</sup> AIPATEF                                                                |                                                    |            |            |            |              |           |
| 7       | VACV WR (AAO89429.1) | FFSTKA <sup>red</sup> AKKPEAKRE                                                                |                                                    |            |            |            |              |           |
| 8       |                      | TKA <sup>red</sup> AKKPEAKREAIV                                                                |                                                    |            |            |            |              |           |
| 9       |                      | AKKPEAKREAIVKAD                                                                                |                                                    |            |            |            |              |           |
| 10      |                      | PEAKREAIVKADEDD                                                                                |                                                    |            |            |            |              |           |
| 11      |                      | KREAIVKADEDDNEE                                                                                |                                                    |            |            |            |              |           |
| 481     | VARV (ABF26518.1)    | AKKPEAK <sup>red</sup> HEAIVKAD                                                                |                                                    |            |            |            |              |           |
| 482     | VACV (AAA48152.1)*   | <sup>red</sup> DKKPEAKREAIVKAD                                                                 |                                                    |            |            |            |              |           |
| 522     | CMLV (CAA52999.1)*   | AKKPEAKREAIV <sup>red</sup> IKAD                                                               |                                                    |            |            |            |              |           |
| 483     | CPXV (AAP48887.1)*   | AKKPEAKREAIVKA <sup>red</sup> E                                                                |                                                    |            |            |            |              |           |
| 484     | CPXV (AAP48888.1)    | AKKPEAKREA <sup>red</sup> FVKA <sup>red</sup> E                                                |                                                    |            |            |            |              |           |
| 485     | CPXV (AAQ72894.1)*   | AKK <sup>red</sup> QEA <sup>red</sup> KREAIVKA <sup>red</sup> E                                |                                                    |            |            |            |              |           |
| 486     | CPXV (AAQ72906.1)    | AKKPEAK <sup>red</sup> HEAIVKA <sup>red</sup> E                                                |                                                    |            |            |            |              |           |
| 488     | ECTV (CAA53000.1)*   | AKKPE <sup>red</sup> DK <sup>red</sup> HEA <sup>red</sup> TVKAD                                |                                                    |            |            |            |              |           |
| 489     | MPXV (CAA52998.1)*   | AKN <sup>red</sup> PE <sup>red</sup> TKREAIVKA <sup>red</sup> Y                                |                                                    |            |            |            |              |           |
| 490     | RCNV (ABD37609.1)    | AKKPEAKR <sup>red</sup> KV <sup>red</sup> VEKAD                                                |                                                    |            |            |            |              |           |
| 491     | VPXV (ABD37608.1)    | AKKPE <sup>red</sup> EKR <sup>red</sup> KAVVKA <sup>red</sup> E                                |                                                    |            |            |            |              |           |
| 492     | SkPXV (AAQ72922.1)*  | AKKPE <sup>red</sup> EPV <sup>red</sup> KR <sup>red</sup> KV <sup>red</sup> VKN <sup>red</sup> |                                                    |            |            |            |              |           |
| 497     | VARV (CAA47501.1)*   | TKFEQIEKCCKRNDE                                                                                |                                                    |            |            |            |              |           |

\*Accession number is representative for several sequences of this type. All GenBank accession numbers can be found in Table S2. Different shades of grey represent strength of the fluorescence intensity.

n.d.: not detected

 Weak reaction  
 Strong reaction
