# Supplementary material for: Species-Specific Conservation of Linear Antigenic Sites on Vaccinia Virus A27 Protein Homologs of Orthopoxviruses
Source: MDPI journal article supplement (doi:10.3390/v11060493), 2019-05-29
Supplement: s1 [file s1]

**Table S7** Mapping of epitope complex #1A-D based on 391 complete and partial amino acid sequences from the NCBI GenBank database.

| Linear A27 epitope aa 26-39 | OPXV genera | Number of DB entries |
|-----------------------------|-------------|----------------------|
| KKPEAKREAIVKAD              | VARV major  | 66/67                |
|                             | VARV minor  | 2/2                  |
|                             | VACV        | 59/61                |
|                             | BPXV        | 26/26                |
|                             | HSPV        | 2/2                  |
|                             | RPXV        | 2/2                  |
|                             | CPXV        | 51/134               |
|                             | TaPXV       | 2/3                  |
| _KPEAKREAIVKAD              | CPXV        | 3/134                |
|                             | TaPXV       | 1/3                  |
| KKPEAKREAIVKAE              | CPXV        | 64/134               |
| _KPEAKREAIVKAE              | CPXV        | 2/134                |
| KKPEAKREAIKAD               | CMLV        | 17/18                |
| KRPEAKREAIKAD               | CMLV        | 1/18                 |
| KRPEAKREAIVKAE              | CPXV        | 1/134                |
| KNPETKREAIVKAY              | MPXV        | 57/57                |
| KKPEDKHEATVKAD              | ECTV        | 13/14                |
| _KPEDKHEATVKAD              | ECTV        | 1/14                 |
| KKPEAKHEAIVKAD              | VARV major  | 1/67                 |
| KKPEAKHEAIVKAE              | CPXV        | 1/134                |
| KKQEAKREAIVKAE              | CPXV        | 8/134                |
| _KQEAKREAIVKAE              | CPXV        | 1/134                |
| KKPEAKREAFVKAE              | CPXV        | 1/134                |
| KKPEVKREAIVKAE              | CPXV        | 1/134                |
| _KPEEKRKAVVKAE              | VPXV        | 1/1                  |
| KKPDRKREQIVKAD              | VACV        | 1/61                 |
| _KPEAKRKVVEKAD              | RCNV        | 1/1                  |

|                                                                |       |      |
|----------------------------------------------------------------|-------|------|
| <u>KSORLNAKQLLKLR</u>                                          | CPXV  | 1/1  |
| <u>TSRSSTGSANPSAS</u>                                          | VACV  | 1/61 |
| KKPE <u>EPV</u> KR <u>KVVKNKNKHKV</u> VKAD ( <u>aa 26-49</u> ) | SkPXV | 3/3  |

- 3 Differences within the epitope sequence are highlighted.
