# Supplementary figures and images for: Species-Specific Conservation of Linear Antigenic Sites on Vaccinia Virus A27 Protein Homologs of Orthopoxviruses
Source: MDPI journal article supplement (doi:10.3390/v11060493), 2019-05-29

A

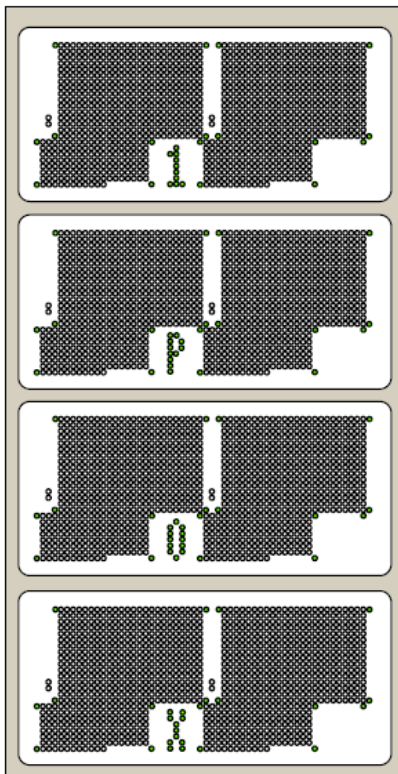

B

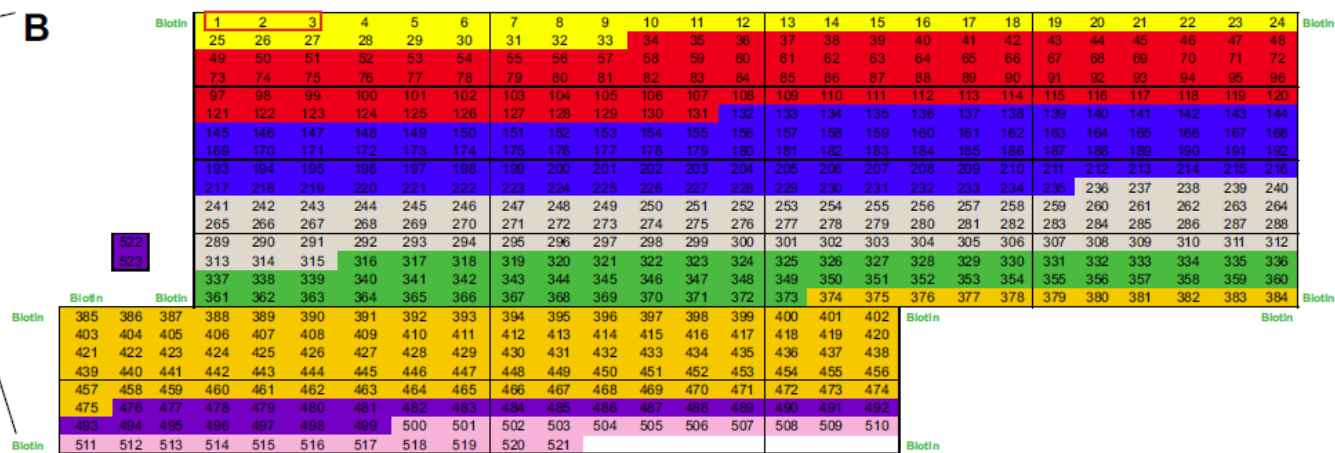

C

| Spot # | Amino acid sequence |
|--------|---------------------|
| 1      | MDGTLFPGDDDLAIP     |
| 2      | TLFPGDDDLAIPATE     |
| 3      | PGDDDLAIPATEFFS     |

Supplement: s1 [file s1]

**Epitope 1A (MAb 5B4/2F2)**

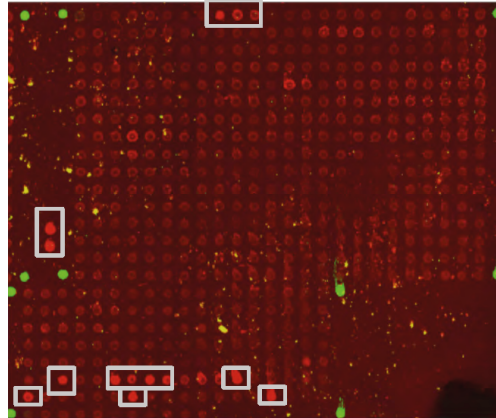

**Epitope 1B (MAb 2C11/1B4)**

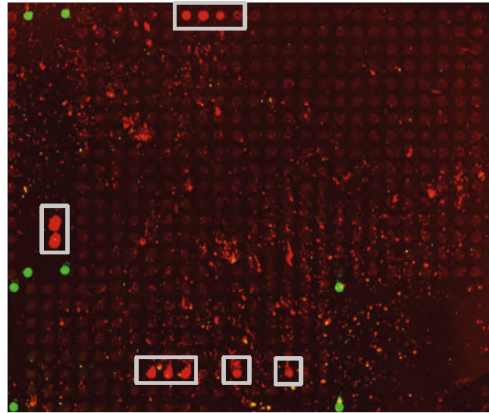

**Epitope 1C (MAb 3F5/2D5)**

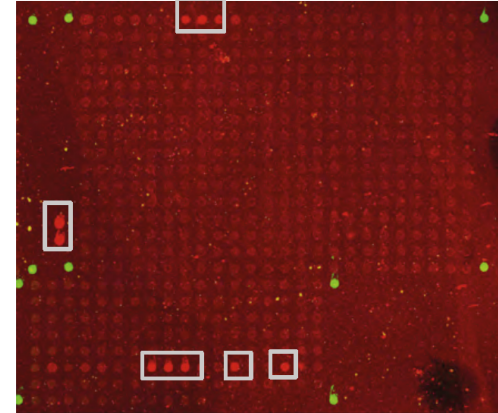

**Epitope 1D (MAb 1D5/2D11)**

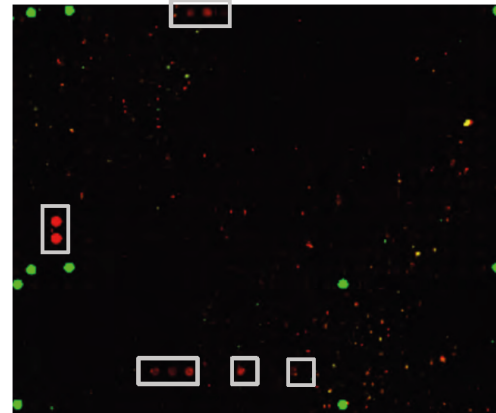

**Epitope 4 (MAb 2G8/1E4)**

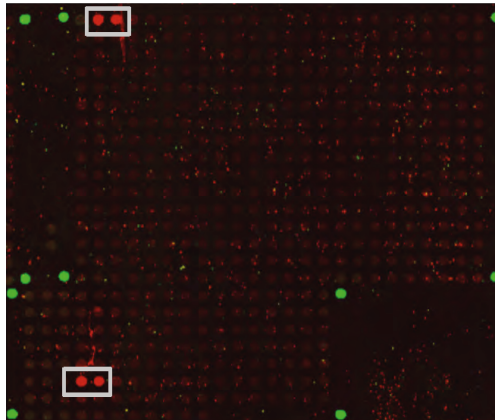

**Epitope 5 (MAb 5B1/2G6)**

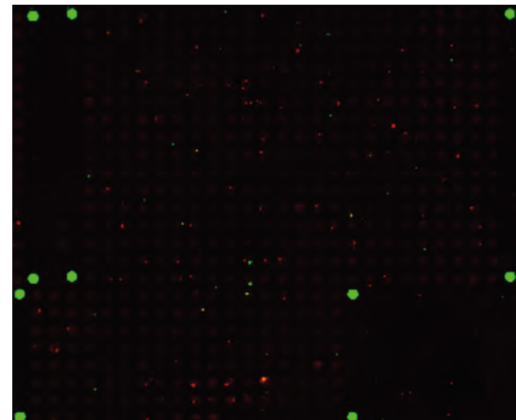

Supplement: s1 [file s1]
